# Supplementary material for: Angiogenic morphogenesis driven by dynamic and heterogeneous collective endothelial cell movement
Source: Oxford University Press journal article supplement (doi:10.1242/dev.068023), 2011-09-30
Supplement: dev068023tables1.pdf [file dev068023tables1.pdf]

**Table S1. The percentage of ECs undergoing mitosis**

|                 | Tip* | Stalk** | Bridge <sup>†</sup> | Junction <sup>‡</sup> | Sheet <sup>§</sup> | All/ <i>n</i> <sup>§</sup> | Ratio (%) |
|-----------------|------|---------|---------------------|-----------------------|--------------------|----------------------------|-----------|
| VEGF (0 ng/ml)  | 0    | 0       | 0                   | 0                     | 0                  | 0/129                      | 0.0       |
|                 | 0    | 2       | 0                   | 0                     | 8                  | 10/233                     | 4.3       |
|                 | 0    | 0       | 0                   | 0                     | 0                  | 0/126                      | 0.0       |
| VEGF (5 ng/ml)  | 0    | 0       | 1                   | 0                     | 3                  | 4/245                      | 1.6       |
|                 | 0    | 0       | 0                   | 1                     | 1                  | 2 /257                     | 0.8       |
|                 | 0    | 1       | 3                   | 4                     | 1                  | 9/217                      | 4.1       |
| VEGF (50 ng/ml) | 0    | 3       | 2                   | 0                     | 0                  | 5/83                       | 6.0       |
|                 | 0    | 2       | 4                   | 3                     | 0                  | 9/211                      | 4.3       |
|                 | 0    | 0       | 0                   | 1                     | 1                  | 2/178                      | 1.1       |

The number of ECs undergoing mitosis at specified places.

\*At the tip.

\*\*At blunt-ended regions (including the tip) distal to the junctions.

<sup>†</sup>At regions connecting two junctions.

<sup>‡</sup>At regions where two or more stalks diverge or converge.

<sup>§</sup>At vascular beds where ECs form sheets.

<sup>§</sup>The total number of ECs observed.
